# Supplementary material for: Preparation of a ZnIn2S4–ZnAlOx nanocomposite for photoreduction of CO2 to CO
Source: Royal Society of Chemistry journal article supplement (doi:10.1039/d1cy00278c), 2021-01-01
Supplement: d1cy00278c1.pdf [file d1cy00278c1.pdf]

## Supporting Information

### Preparation of $\text{ZnIn}_2\text{S}_4\text{-ZnAlO}_x$ nanocomposite for the photoreduction of $\text{CO}_2$ to CO

Yuqing Shao,<sup>a</sup> Xinkui Wang,<sup>\*a</sup> Zhaolin Dou,<sup>b</sup> Xiaoyu Liang,<sup>a</sup> Xinxin Zhang,<sup>a</sup> Min Pang,<sup>c</sup>

Qiang Xu,<sup>a</sup> Min Ji,<sup>a</sup> Min Wang<sup>\*b</sup>

<sup>a</sup> State Key Laboratory of Fine Chemicals, School of Chemical Engineering, Dalian University of Technology, Dalian, 116024, Liaoning, China

<sup>b</sup> Zhang Dayu School of Chemistry, Dalian University of Technology, Dalian 116024, Liaoning, China

<sup>c</sup> Institute of Materials, China Academy of Engineering Physics, Mianyang, 621907, Sichuan, China

*\*Correspondence to: [wangxinkui@dlut.edu.cn](mailto:wangxinkui@dlut.edu.cn) and [wangmin@dlut.edu.cn](mailto:wangmin@dlut.edu.cn)*

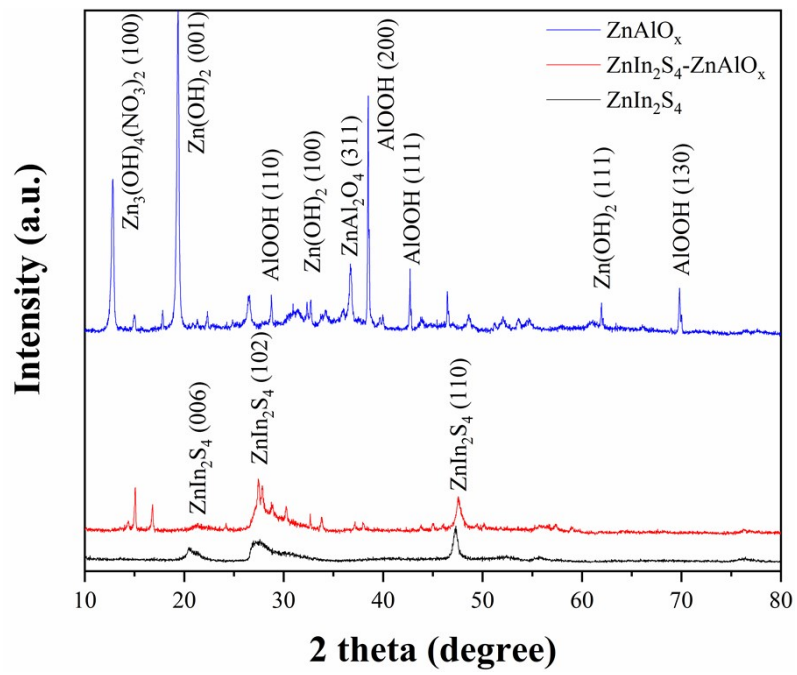

Fig. S1 XRD patterns of  $\text{ZnAlO}_x$ ,  $\text{ZnIn}_2\text{S}_4\text{-ZnAlO}_x$  and  $\text{ZnIn}_2\text{S}_4$

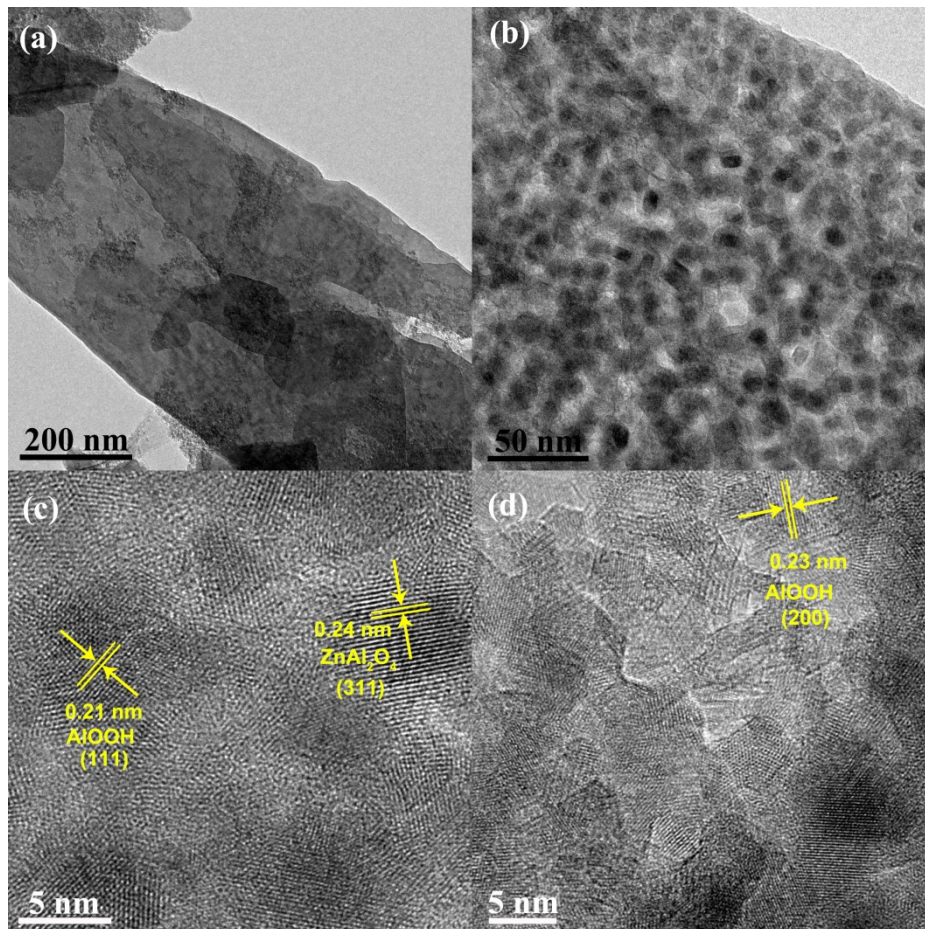

Fig. S2 TEM (a-b) and HRTEM (c-d) images of  $\text{ZnAlO}_x$

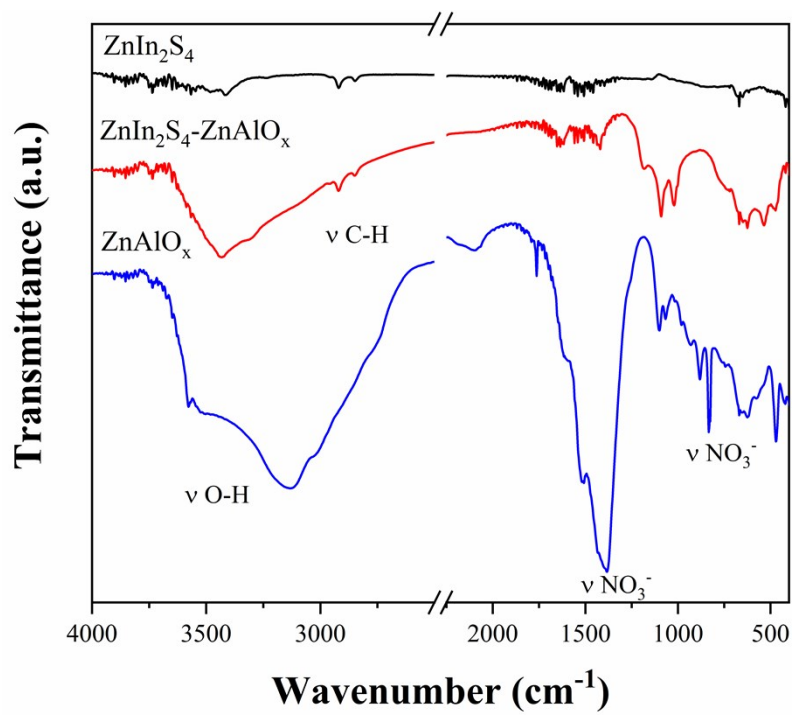

**Fig. S3** FT-IR spectrum of  $\text{ZnAlO}_x$ ,  $\text{ZnIn}_2\text{S}_4$  and  $\text{ZnIn}_2\text{S}_4\text{-ZnAlO}_x$

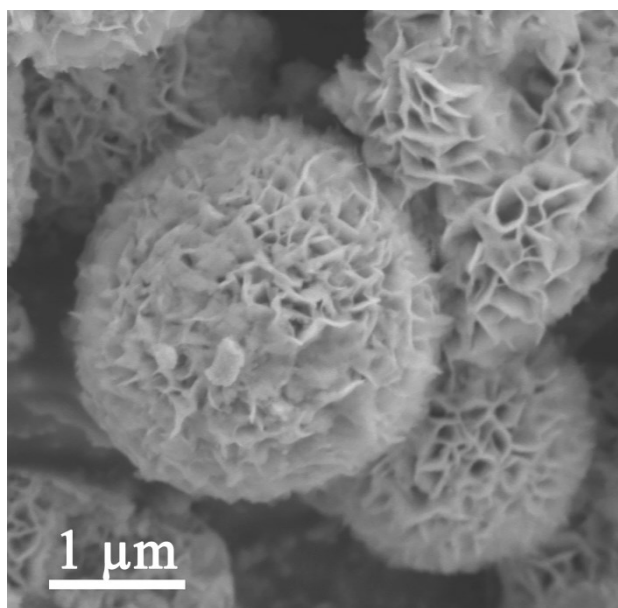

**Fig. S4** SEM image of  $\text{ZnIn}_2\text{S}_4$

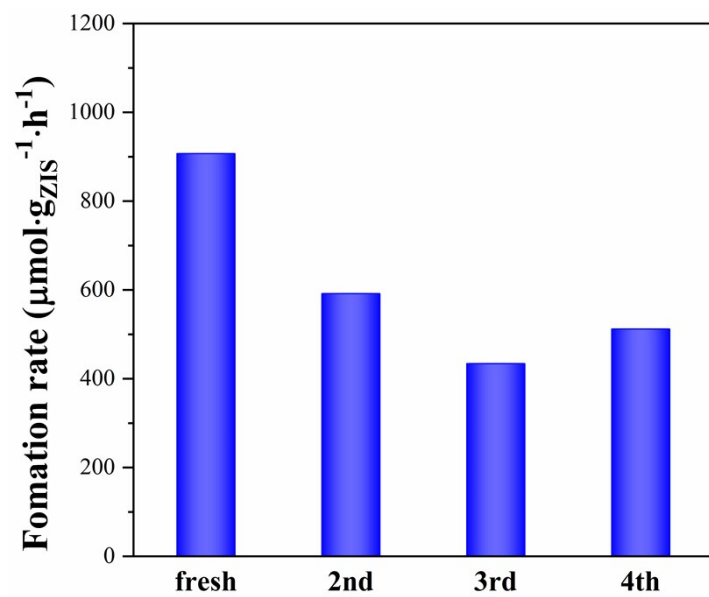

Fig. S5 Stability tests of ZnIn<sub>2</sub>S<sub>4</sub>-ZnAlO<sub>x</sub>
